# Supplementary material for: A Comparative Analysis of MicroRNA Expression in Mild, Moderate, and Severe COVID-19: Insights from Urine, Serum, and Nasopharyngeal Samples
Source: MDPI journal article supplement (doi:10.3390/biom13121681), 2023-11-21
Supplement: s1 [file s1]

|  | Serum | Urine | Nasopharyngeal |
|--|-------|-------|----------------|
|--|-------|-------|----------------|

miR- 21

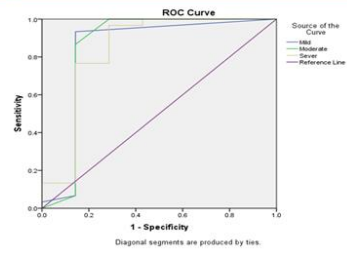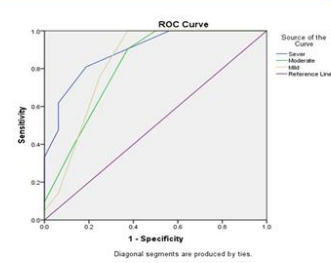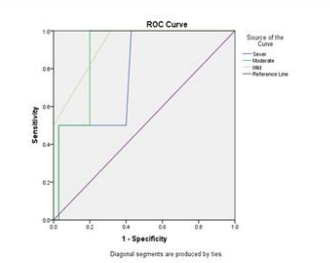

miR- let- 7

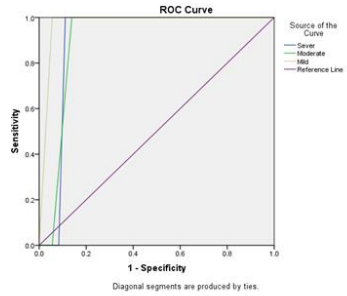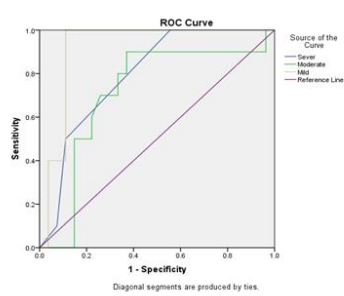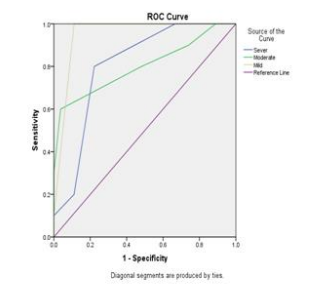

|  | Serum | Urine | Nasopharyngeal |
|--|-------|-------|----------------|
|--|-------|-------|----------------|

miR- 146a

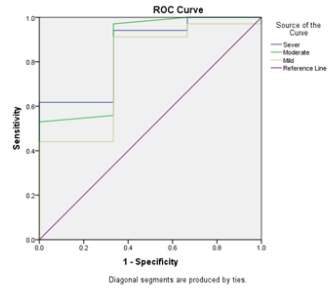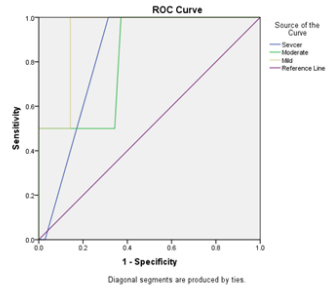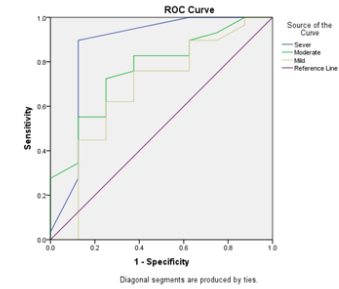

miR- 146b

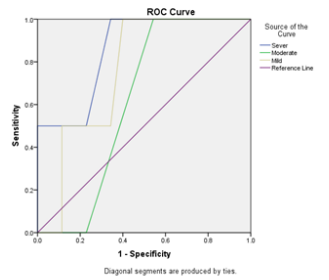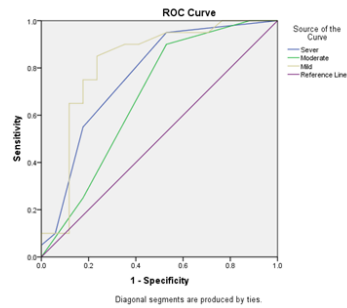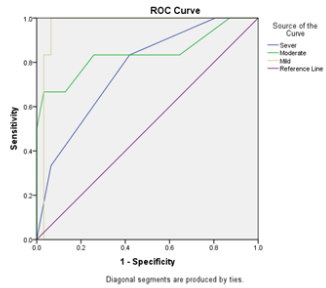

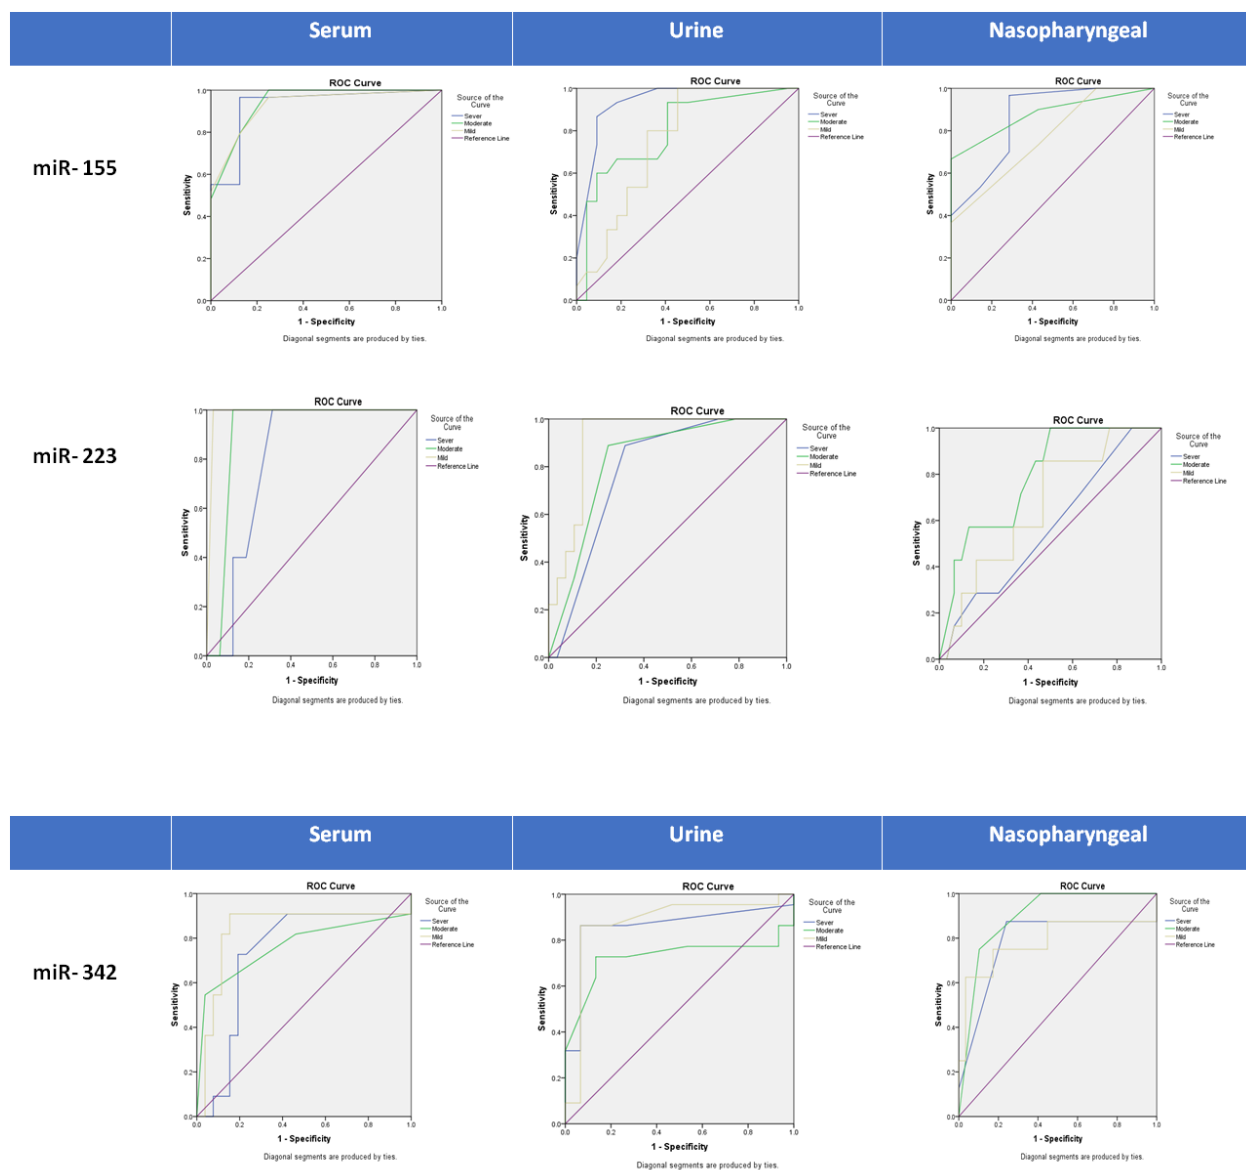

Figure S1. ROC curve analysis using Serum, Urine and Nasopharyngeal miR-21, miR-146a, miR-146b, miR-155, let-7b, miR-223 and miR-342 for discriminating control, mild, moderate and severe COVID-19 patients.
